# Supplementary material for: The Hypolipidemic Effect of Hawthorn Leaf Flavonoids through Modulating Lipid Metabolism and Gut Microbiota in Hyperlipidemic Rats
Source: Hindawi journal article supplement (doi:10.1155/2022/3033311), 2022-11-15

# One-way ANOVA bar plot on phylum level

p\_\_Bacteroidetes

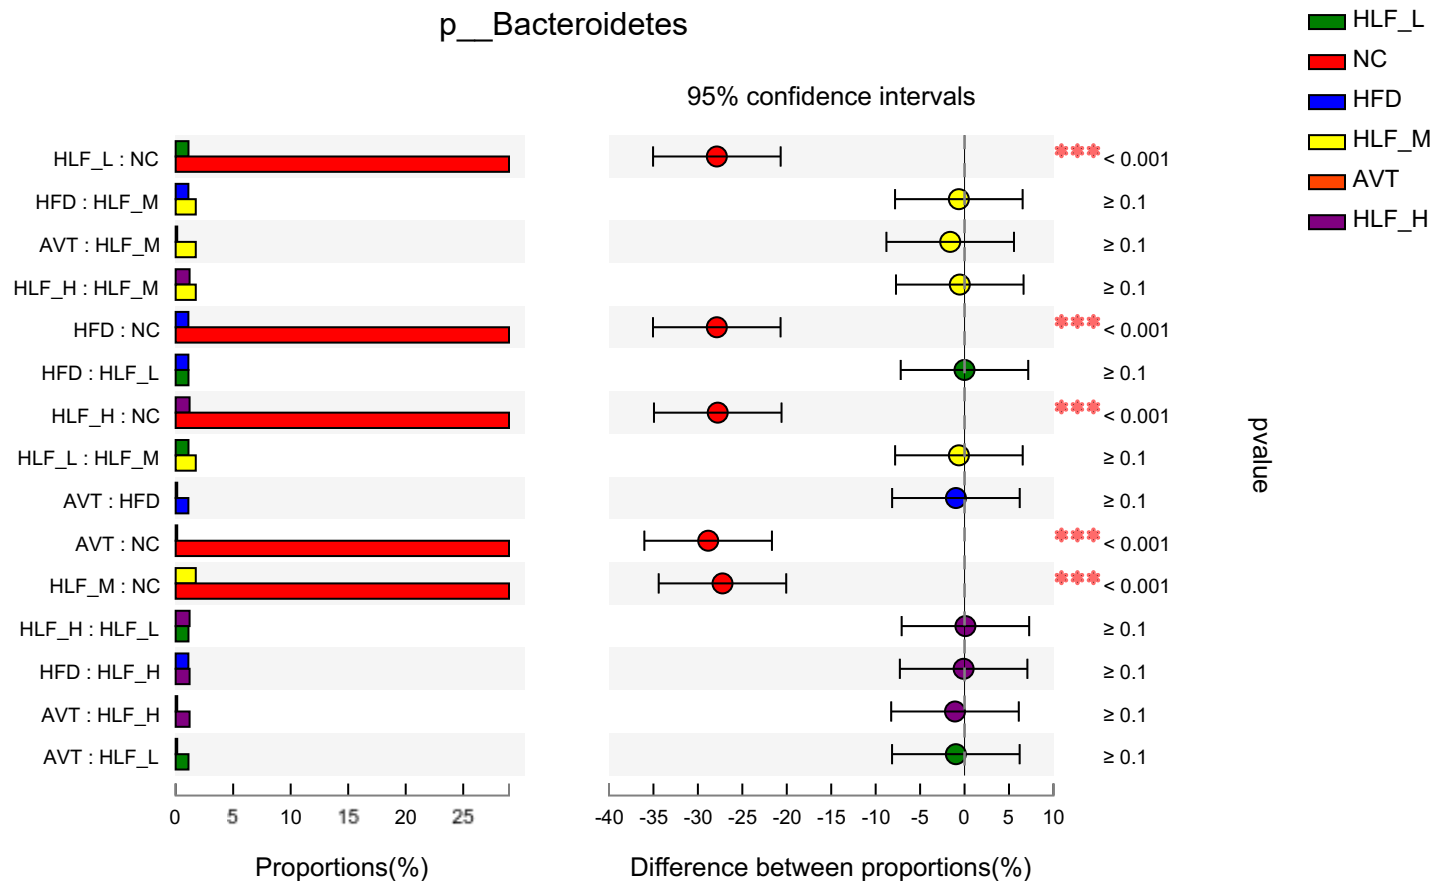

# One-way ANOVA bar plot on phylum level

p\_Firmicutes

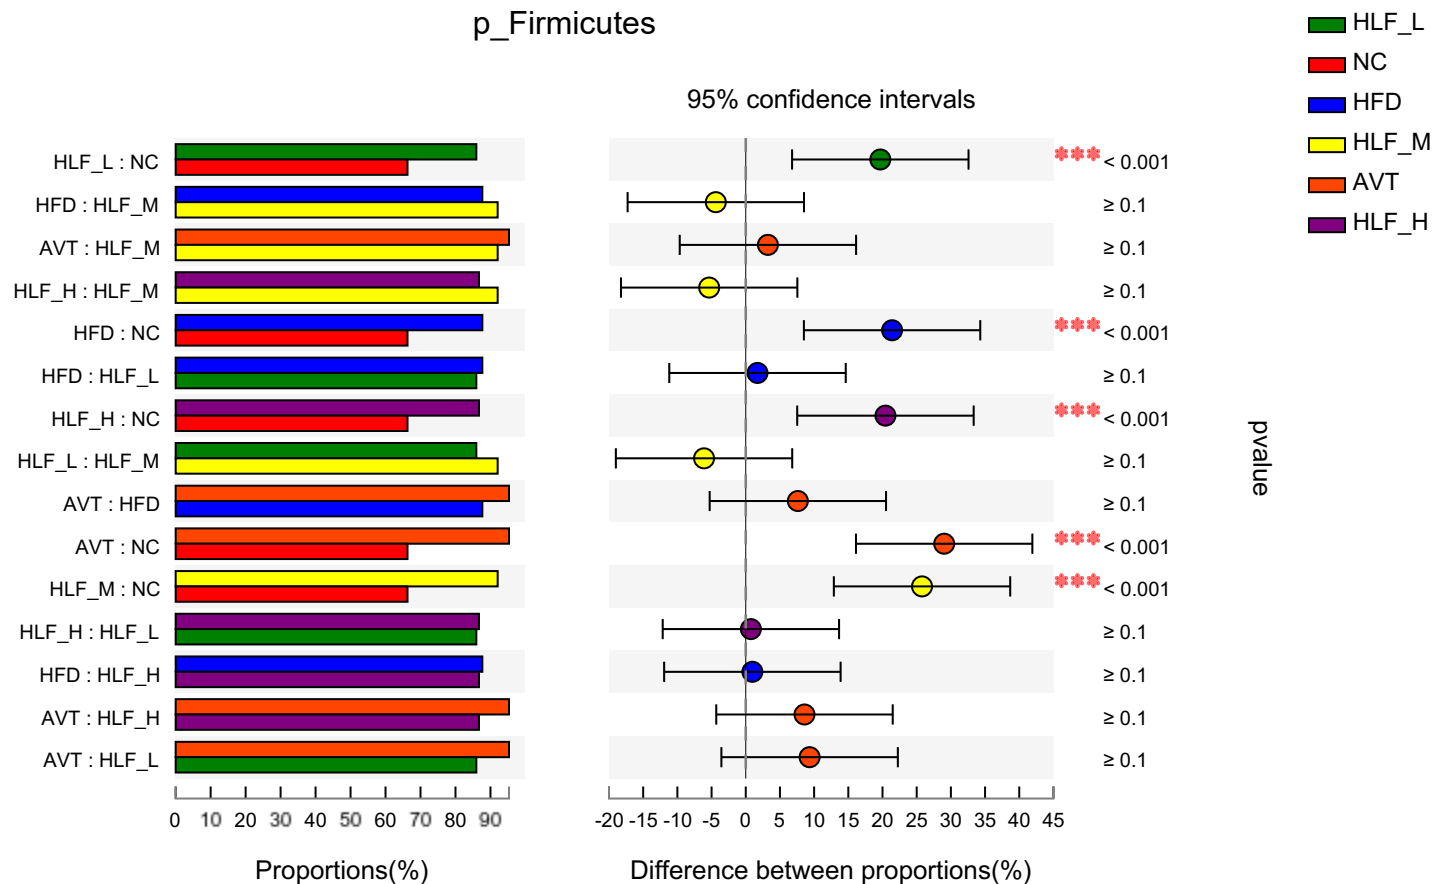

# One-way ANOVA bar plot on phylum level

p\_\_Proteobacteria

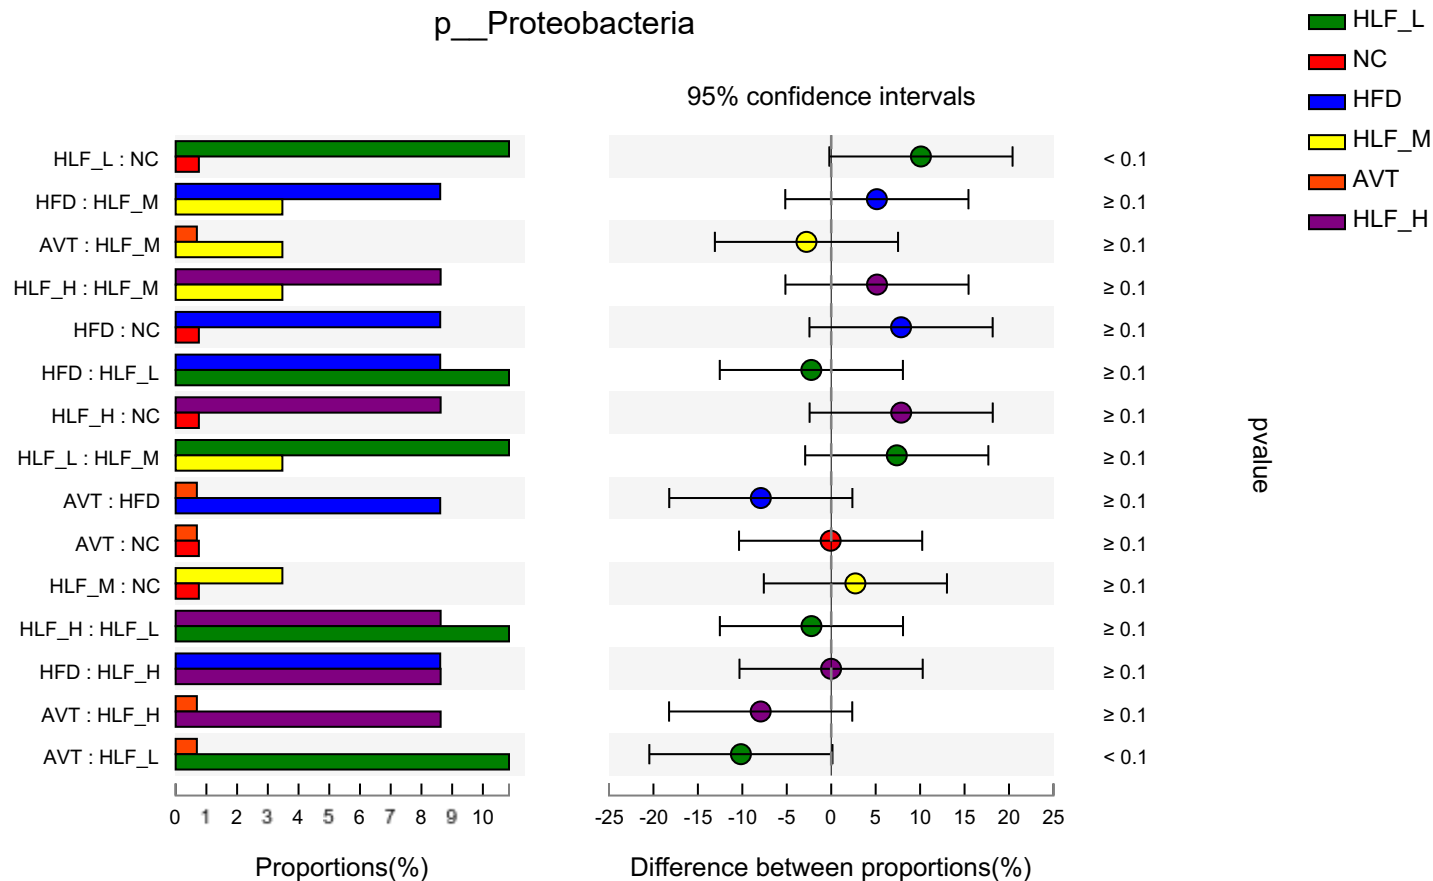

# One-way ANOVA bar plot on phylum level

p\_\_Verrucomicrobia

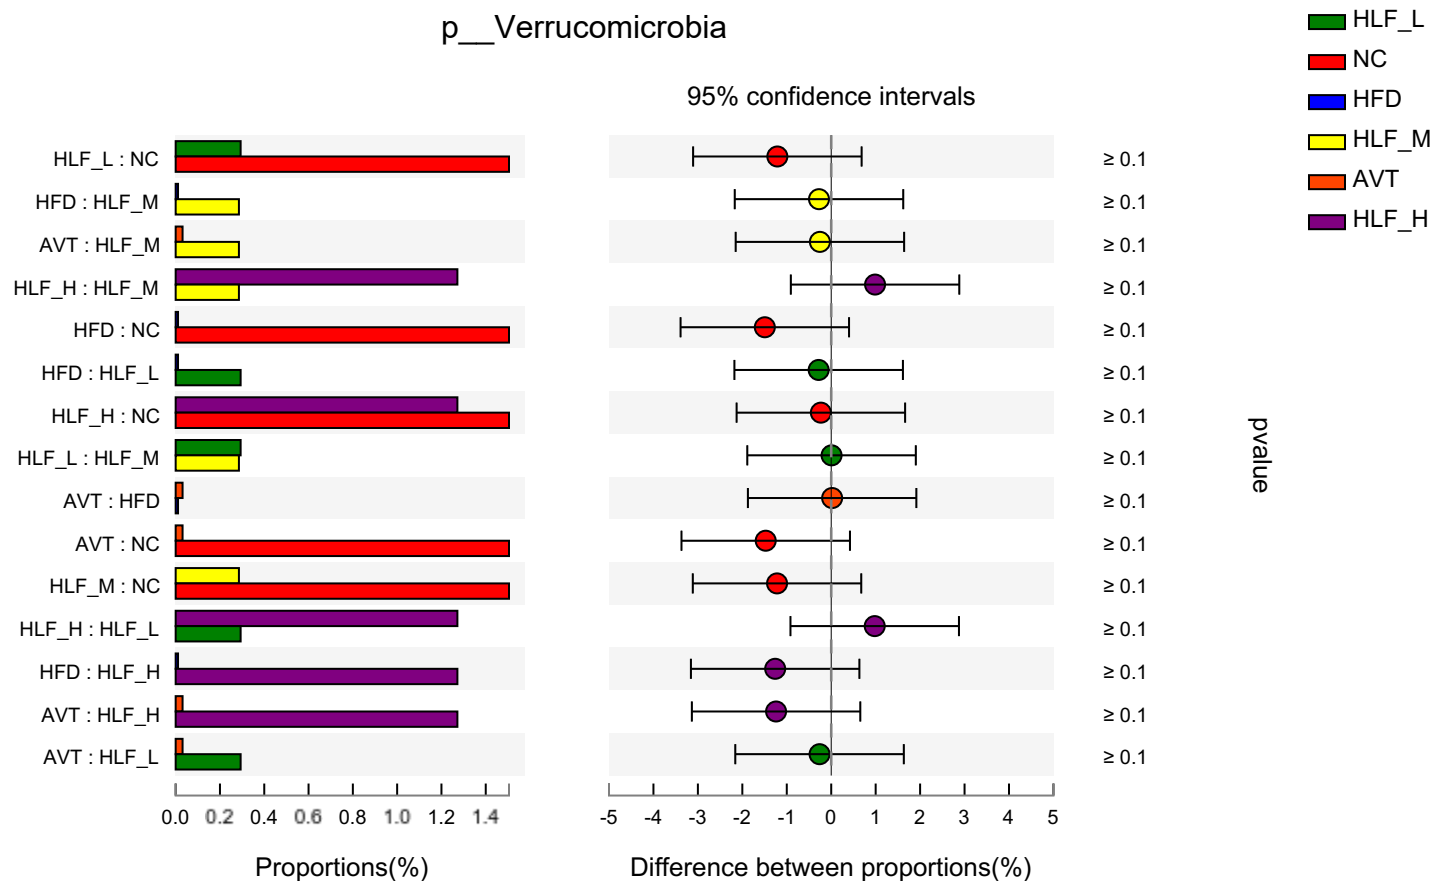

Supplement: f1 [file 3033311.f1.zip]
