# Supplementary material for: The Hypolipidemic Effect of Hawthorn Leaf Flavonoids through Modulating Lipid Metabolism and Gut Microbiota in Hyperlipidemic Rats
Source: Evid Based Complement Alternat Med. 2022 Nov 15;2022:3033311. doi: 10.1155/2022/3033311 (PMC9681556; doi:10.1155/2022/3033311)
Supplement: Supplementary Materials — of this article contain the molecular docking diagram of HLF. Autodock tools-1.5.6 software is used to dock the active ingredients and target proteins of HLF, and the conformation with the lowest docking binding energy is selected for docking mode analysis, and PyMOL software is used for molecular docking mapping and display. Pharmacophore analysis was performed using the Ligplot + program to evaluate hydrogen bonds and van der Waals interaction residues. [file 3033311.f1.zip]

Archive with 2 entries (2 files):
- phylum level.pdf
- Supplementary material 20220708.pdf
